# Supplementary material for: Facile synthesis of erbium vanadate nanoribbons for electrochemical detection of 4-nitrotoluene
Source: Royal Society of Chemistry journal article supplement (doi:10.1039/d4en01025f), 2025-01-01
Supplement: d4en01025f1.pdf [file d4en01025f1.pdf]

**Supporting information**

**Facile synthesis of erbium vanadate nanoribbons for electrochemical detection  
of 4-nitrotoluene**

*Aravind Radha,<sup>‡</sup> Sea-Fue Wang<sup>‡,\*</sup>*

<sup>‡</sup>Department of Materials and Mineral Resources Engineering, National Taipei University of  
Technology, Taipei 106, Taiwan.

**\*Corresponding author**

**Sea-Fue Wang:** [sfwang@ntut.edu.tw](mailto:sfwang@ntut.edu.tw)

## Chemicals and reagents

Erbium nitrate, ( $\text{Er}(\text{NO}_3)_3$ ), Ammonium metavanadate ( $\text{NH}_4\text{VO}_3$ ), Urea ( $\text{CO}(\text{NH}_2)_2$ ), Polyvinylpyrrolidone ( $\text{C}_6\text{H}_9\text{NO}$ )<sub>n</sub>, 4-Nitrotoluene ( $\text{C}_7\text{H}_7\text{NO}_2$ ),  $[\text{Fe}(\text{CN})_6]^{4-3-}$ , sodium hydroxide ( $\text{NaOH}$ ), potassium chloride ( $\text{KCl}$ ), sodium phosphate dibasic ( $\text{Na}_2\text{HPO}_4$ ), sodium dihydrogen phosphate ( $\text{NaH}_2\text{PO}_4$ ), acetone, and ethanol were procured. Ultrapure fresh water is obtained from a millipore water purification system (Milli-Q, specific resistivity > 18 M $\Omega$ cm, S.A.; Molsheim, France) and is used in all the experiments and  $\text{Na}_2\text{HPO}_4$  and  $\text{NaH}_2\text{PO}_4$  are utilized to prepare 0.1 M (pH 7) PB (phosphate buffer). All the electrochemical experiments are carried out using 0.1 M PB (pH 7) as the supporting electrolyte.

## Instrumentation and methods

Phase configuration is identified using X-ray diffraction analysis (XRD) (Bruker (D2 XRD) instrument). The Fourier transform infrared (FTIR) spectra were recorded by using an FTIR spectrophotometer (JASCO 6600). The surface morphology and the elemental composition are studied utilizing high resolution (HR) transmission electron microscopy (TEM) (JEM-2100F (HR), JEOL LTD)) operating at 200 kV by using JOEL Serive Advanced Technology. By utilizing these characterization methods, the physical properties of the as-prepared materials are investigated. The electrochemical properties are explored using electrochemical impedance spectroscopy (EIS) through Autolab (PGSTAT101). CHI 1211c electrocatalytic workstation is functional to carry out the electrochemical measurements like cyclic voltammetry (CV) and differential pulse voltammetry (DPV) in a conventional three electrode cell. Here, the modified SPCE (surface area = 0.072 cm<sup>2</sup>), saturated Ag|AgCl and Pt wire are active as working, reference and counter electrodes, respectively.

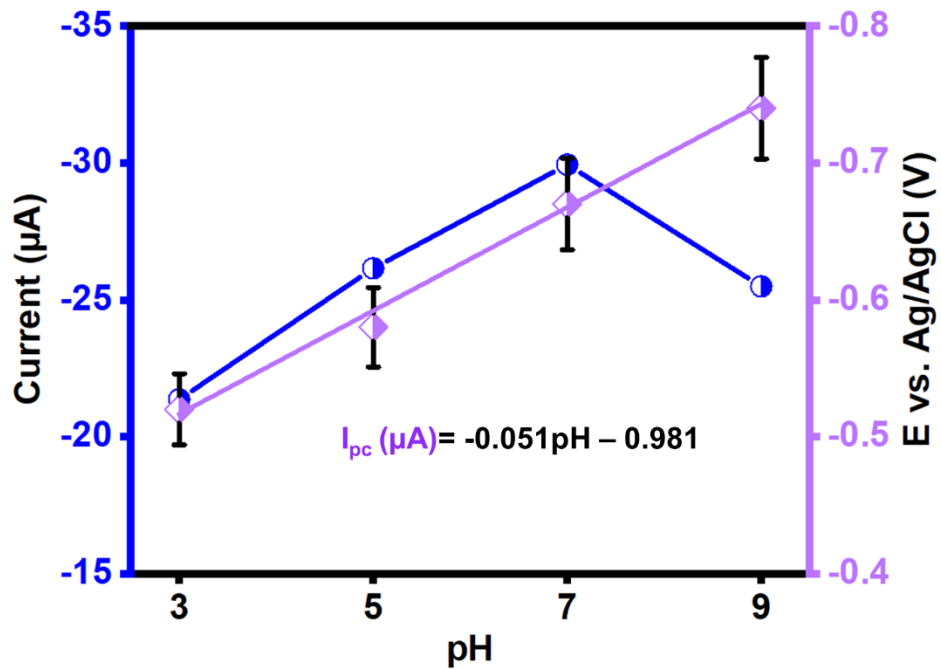

**Figure S1.** Plot of pH versus 4-nitrotoluene peak currents and potentials at  $ErVO_4/SPCE$  in the presence of 4-nitrotoluene.

**Table S1.** Comparison of 4-NT determination toward ErVO<sub>4</sub>/SPCE with previously reported work.

| <b>Materials</b>                      | <b>Linear range<br/>(<math>\mu\text{M}</math>)</b> | <b>Limit of<br/>detection (nM)</b> | <b>Detection<br/>technique</b> | <b>Ref.</b>      |
|---------------------------------------|----------------------------------------------------|------------------------------------|--------------------------------|------------------|
| CeW/SPCE                              | 0.01–576                                           | 34                                 | DPV                            | S1               |
| GCE/ $\alpha$ -MnO <sub>2</sub>       | 0.162–48.80                                        | 144.0                              | CV                             | S2               |
| MWCNTs-GCE                            | 225.0–2600                                         | 43.00                              | CV                             | S3               |
| ZnC/SPCE                              | 0.050–385.5                                        | 44.00                              | DPV                            | S4               |
| Ag <sub>2</sub> O NPs/Au              | 0.500–4.000;<br>37.00–175.0                        | 62.30                              | LSV                            | S5               |
| NH <sub>2</sub> -Fe-MIL-<br>88B@OMC-3 | 20.00–225.0                                        | 8000                               | DPV                            | S6               |
| ErVO <sub>4</sub> /SPCE               | 0.01-375                                           | 9                                  | DPV                            | <b>This work</b> |

MWCNT: Multiwall carbon nanotube, LSV: Linear sweep voltammetry, CV: Cyclic voltammetry, DPV: Differential pulse voltammetry. SPCE: Screen printed carbon electrode

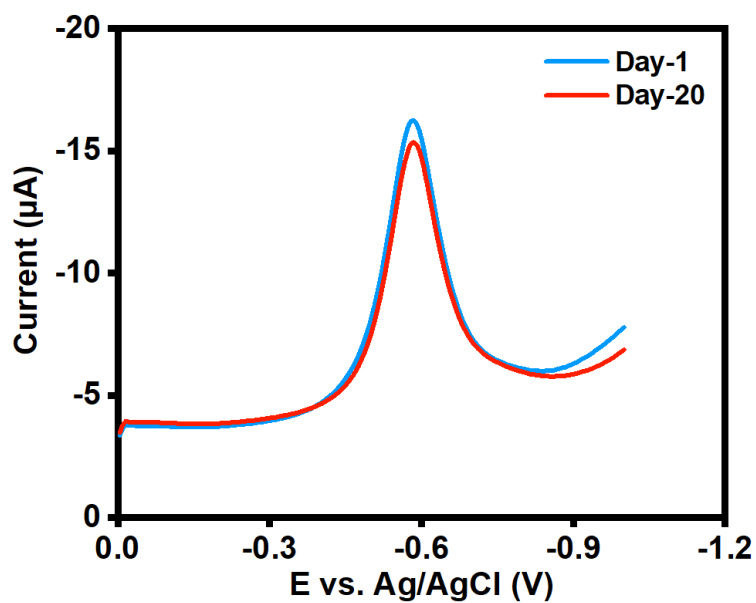

**Figure S2.** Long-term stability of ErVO<sub>4</sub> modified electrode in the presence of 4-NT.

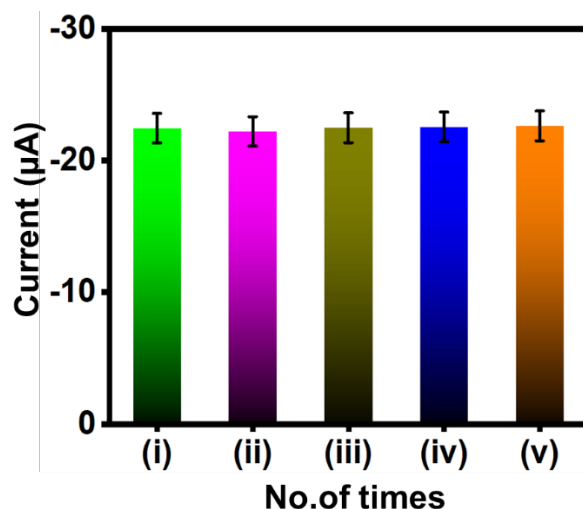

**Figure S3.** Repeatability of ErVO<sub>4</sub> modified electrode in the presence of 4-NT for 5times.

**Reference:**

**S1.** Kogularasu, S., Sriram, B., Wang, S.F., Lin, W.C., Lee, Y.Y., Chen, Y.L. and Chang-Chien, G.P., 2024. Sustainable Synthesis of Rare Earth Metal Tungstates (REWO, RE= Ce, SM, Gd) for Electrochemical Detection of 4-Nitrotoluene. *ACS Engineering Au*.

**S2.** Ahmad, K., Mohammad, A. and Mobin, S.M., 2017. Hydrothermally grown  $\alpha$ -MnO<sub>2</sub> nanorods as highly efficient low-cost counter-electrode material for dye-sensitized solar cells and electrochemical sensing applications. *Electrochimica Acta*, 252, pp.549-557.

**S3.** Fakhari, A.R. and Ahmar, H., 2011. A new method based on headspace adsorptive accumulation using a carboxylated multi-walled carbon nanotubes modified electrode: application for trace determination of nitrobenzene and nitrotoluene in water and wastewater. *Analytical Methods*, 3(11), pp.2593-2598.

**S4.** Krishnapandi, A., Rajakumaran, R., Chen, S.M., Li, Y.L., Chen, T.W., Lee, S.Y. and Chang, W.H., 2019. Facile synthesis of zinc cobaltate nano flakes: an enhanced electrochemical detection of organic pollutant 4-nitrotoluene. *International Journal of Electrochemical Science*, 14(8), pp.8058-8069.

- S5.** Chakraborty, U., Garg, P., Bhanjana, G., Kaur, G., Kaushik, A. and Chaudhary, G.R., 2022. Spherical silver oxide nanoparticles for fabrication of electrochemical sensor for efficient 4-Nitrotoluene detection and assessment of their antimicrobial activity. *Science of The Total Environment*, 808, p.152179.
- S6.** Yuan, S., Bo, X. and Guo, L., 2018. In-situ growth of iron-based metal-organic framework crystal on ordered mesoporous carbon for efficient electrocatalysis of p-nitrotoluene and hydrazine. *Analytica Chimica Acta*, 1024, pp.73-83.
